# Supplementary material for: PKR Activation Favors Infectious Pancreatic Necrosis Virus Replication in Infected Cells
Source: MDPI journal article supplement (doi:10.3390/v8060173), 2016-06-21
Supplement: s1 [file s1]

# Supplementary Materials: PKR Activation Favors Infectious Pancreatic Necrosis Virus Replication in Infected Cells

Amr A.A. Gamil, Cheng Xu, Stephen Mutoloki and Øystein Evensen

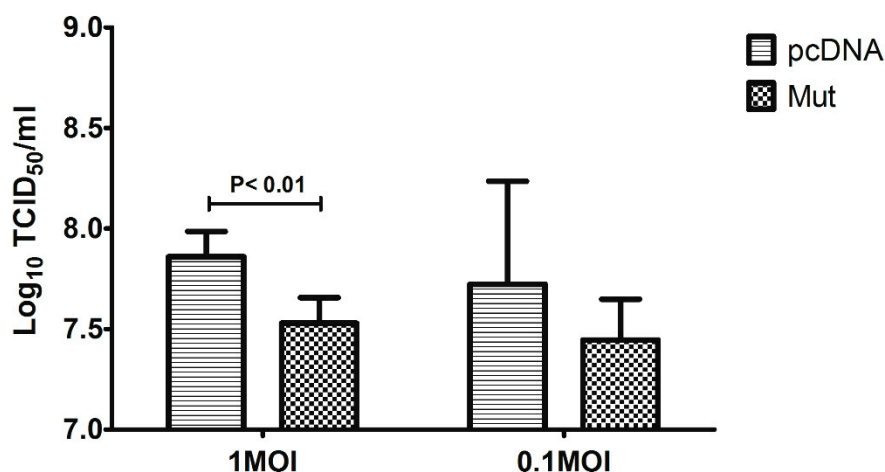

**Figure S1.** mutcarpPKR effect on IPNV titer in EPC cells. EPC cells in each well of 6-well plates were transfected with a total amount of 2 µg of pcDNA3.1-mutPKR or pcDNA3.1-myc-His plasmids. At 2 h post transfection, the cells were infected with 1 and 0.1 MOI IPNV. Cell supernatants were collected at 72 hpi for virus titration (in CHSE cells; mean + SEM,  $n = 3$ ).

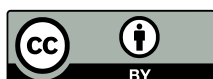

© 2016 by the authors; licensee MDPI, Basel, Switzerland. This article is an open access article distributed under the terms and conditions of the Creative Commons by Attribution (CC-BY) license (<http://creativecommons.org/licenses/by/4.0/>).
